# Supplementary material
Source: publisher figshare collection journal article supplement (https://acs.figshare.com/ndownloader/files/18009488)
Supplement: Supplementary file 1 [file 18009488]

## Contact-killing of Gram-Positive and Gram-Negative Bacteria on PDMS Provided with Immobilized Hyperbranched Antibacterial Coatings

Jia Jia Dong<sup>1</sup>, Agnieszka Muszanska<sup>2</sup>, Fei Xiang<sup>1</sup>, Richard Falkenberg<sup>2</sup>, Betsy van de Belt-Gritter<sup>3</sup>, Ton Loontjens<sup>\*1</sup>

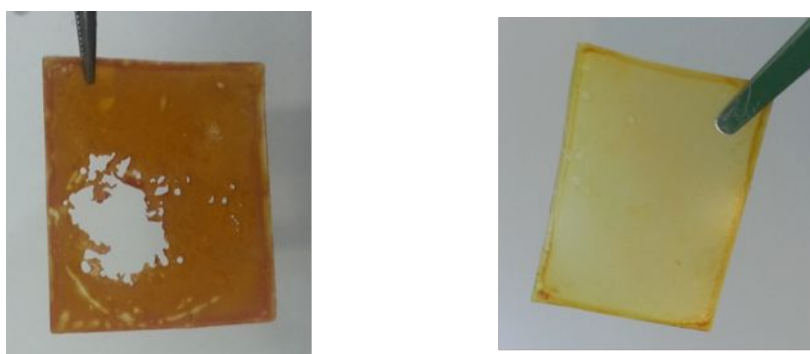

Figure S1. Alkylation with hexyl bromide in the presence of KOH (left) or with a proton sponge (*1,8-bis(dimethylamino)naphthalene*).

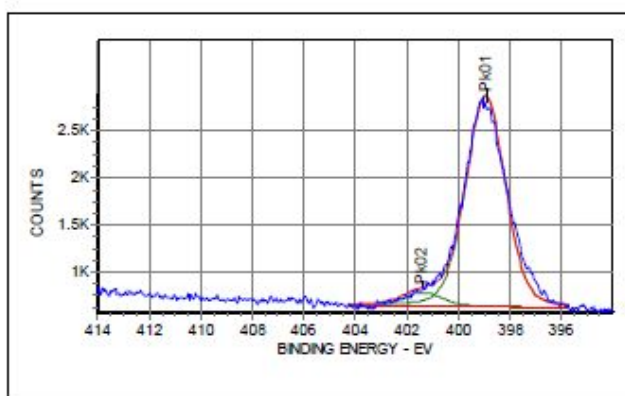

Figure S2. Nitrogen XPS spectrum of antibacterial hyperbranched coating on PDMS
